# Supplementary material for: Prevalence and Antimicrobial Resistance ofSalmonellaIsolated from Animal-Origin Food Items in Gondar, Ethiopia
Source: Hindawi journal article supplement (doi:10.1155/2016/4290506), 2016-01-01
Supplement: f1 [file 4290506.f1.xlsx]

## Sheet: Sheet1
Table S1: Biochemical confirmation of Salmonella
ID No	Sample type	Selective Media and Enrichment	Sub-culture Medium	Biochemical Test
				Triple sugar iron (TSI) agar				VP test	Indol test	Citrate test	Urease test	Lysine Iron Agar (LIA)
				Slant	Butt	H2S	Gas					Slant	Butt	H2S	Gas
RM001	Raw Meat	RVS broth and XLD agar	Nutrient agar	R	Y	+	-	-	-	+	+	P	P	+	+
RM019	Raw Meat	RVS broth and XLD agar	Nutrient agar	R	Y	+	+	-	-	-	+	P	P	+	+
RM024	Raw Meat	RVS broth and XLD agar	Nutrient agar	R	Y	+	+	-	-	+	+	P	P	+	+
RM033	Raw Meat	RVS broth and XLD agar	Nutrient agar	R	Y	+	+	-	-	+	+	P	P	+	+
RM035	Raw Meat	RVS broth and XLD agar	Nutrient agar	R	Y	-	-	-	-	+	+	P	Y	-
RM038	Raw Meat	RVS broth and XLD agar	Nutrient agar	R	Y	+	+	-	-	+	+	P	P	+	+
RE009	Raw Egg	RVS broth and XLD agar	Nutrient agar	R	Y	-	+	-	-	-	+	P	P	+	-
RE010	Raw Egg	RVS broth and XLD agar	Nutrient agar	R	Y	+	+	-	-	+	+	P	P	+	+
RE012	Raw Egg	RVS broth and XLD agar	Nutrient agar	R	Y	+	+	-	-	+	+	P	P	+	-
RE024	Raw Egg	RVS broth and XLD agar	Nutrient agar	R	Y	+	+	-	+	+	+	P	P	+	+
RE030	Raw Egg	RVS broth and XLD agar	Nutrient agar	R	Y	+	+	-	-	+	+	P	P	+	-
RE038	Raw Egg	RVS broth and XLD agar	Nutrient agar	R	Y	-	+	-	-	-	+	P	P	+	+
RE043	Raw Egg	RVS broth and XLD agar	Nutrient agar	R	Y	+	+	-	-	+	-	P	P	+	+
RE044	Raw Egg	RVS broth and XLD agar	Nutrient agar	R	Y	+	+	-	-	+	+	P	P	+	+
RE048	Raw Egg	RVS broth and XLD agar	Nutrient agar	R	Y	+	+	-	-	+	+	P	P	+	+
MB005	Minced Beef	RVS broth and XLD agar	Nutrient agar	R	Y	+	+	-	-	+	+	P	P	+	+
MB006	Minced Beef	RVS broth and XLD agar	Nutrient agar	R	Y	+	+	+	-	+	+	P	P	+	+
BR004	Burger	RVS broth and XLD agar	Nutrient agar	R	Y	+	-	-	-	+	+	P	P	+	+
MK002	Raw Milk	RVS broth and XLD agar	Nutrient agar	R	Y	+	+	-	-	+	+	P	P	+	+
MK041	Raw Milk	RVS broth and XLD agar	Nutrient agar	R	Y	+	+	-	-	+	-	P	P	+	+
MK050	Raw Milk	RVS broth and XLD agar	Nutrient agar	R	Y	+	+	-	-	+	+	P	P	+	+
	RVS =Rappaport-Vassiliadis medium with soya; XLD = Xylose Lysine Deoxycholate Agar; TSI =Triple Sugar Iron Agar; VP = Voges-Proskauer; LIA = Lysine Iron Agar; P = Purple; R = Red; Y =Yellow; + = Positive; - = Negative
											LCD = ------------
